# Supplementary material for: Estimating the Number of Persons Who Inject Drugs in the United States by Meta-Analysis to Calculate National Rates of HIV and Hepatitis C Virus Infections
Source: PLoS One. 2014 May 19;9(5):e97596. doi: 10.1371/journal.pone.0097596 (PMC4026524; doi:10.1371/journal.pone.0097596)
Supplement: Table S2 — Number, rate, and rate ratio of diagnoses of HIV infection among adult and adolescent persons who inject drugs (PWID), by selected characteristics—United States, 2011. (XLSX) [file pone.0097596.s002.xlsx]

## Sheet: Table S2
	Table S2. Number, rate, and rate ratio of diagnoses of HIV infection among adult and adolescent persons who inject drugs (PWID), by selected characteristics--United States, 2011														Table S2, continued
	Males							Females							Total
	No. of PWID cases¶	Rate†	95% CI		Rate Ratio	95% CI		No. of PWID cases¶	Rate†	95% CI		Rate Ratio	95% CI		No. of PWID cases¶	Rate†	95% CI		Rate Ratio	95% CI
Race/ethnicity
White	494.922	15.7181	12 - 22		1	--		445.163	32.1617	28 - 37		1	--		940.085	20.5184	17 - 27		1	--
Black	1082.58	220.652	159 - 360		14.038	7.2 - 29.5		715.356	283.65	171 - 831		8.81949	4.6 - 29.5		1797.94	230.353	157 - 436		11.2266	5.8 - 26.3
Hispanic/Latino*	566.445	123.826	89 - 203		7.87792	4.0 - 16.6		209.877	149.065	111 - 229		4.63485	3.0 - 8.1		776.322	121.144	89 - 190		5.90416	3.3 - 11.5
Other**	76.1013	37.6397	23 - 112		2.39467	1.0 - 9.1		57.2588	46.0187	35 - 66		1.43085	0.9 - 2.4		133.36	42.3108	30 - 74		2.06209	1.1 - 4.5
Age at diagnosis
13-24	133.279	28.2959	20 - 51		1	--		135.904	56.0105	50 - 64		1	--		269.183	40.8635	32 - 56		1	--
25-34	403.164	55.9077	38 - 107		1.97582	0.7 - 5.5		320.422	125.044	107 - 150		2.23251	1.7 - 3.0		723.586	72.3372	51 - 122		1.77021	0.9 - 3.8
35-49	923.745	72.2525	56 - 100		2.55346	1.1 - 5.1		582.436	93.1039	72 - 131		1.66226	1.1 - 2.6		1506.18	78.6901	62 - 107		1.92568	1.1 - 3.3
50-64	759.864	45.4412	36 - 60		1.60593	0.7 - 3.1		388.892	59.0875	45 - 85		1.05494	0.7 - 1.7		1148.76	45.3903	34 - 67		1.11078	0.6 - 2.1
Overall	2220.05	48.9823	37 - 73		0.706676	0.4 - 1.3		1427.66	69.3137	55 - 94		1	--		3647.71	55.164	42 - 80		--	--
	Note. Data include persons with a diagnosis of HIV infection regardless of stage of disease at diagnosis. CI=Confidence Interval
	* Hispanics/Latinos may be of any race.
	** Other race includes American Indian/Alaska Native, Native Hawaiian/Other Pacific Islander, Unknown race/ethnicity, and multiple races
	¶ Number of cases diagnosed with HIV infection or living with HIV infection was statistically adjusted to account for reporting delays and missing risk factor information, but not for incomplete reporting.
	† Per 100,000 PWID
