# Supplementary material for: Estimating the Number of Persons Who Inject Drugs in the United States by Meta-Analysis to Calculate National Rates of HIV and Hepatitis C Virus Infections
Source: PLoS One. 2014 May 19;9(5):e97596. doi: 10.1371/journal.pone.0097596 (PMC4026524; doi:10.1371/journal.pone.0097596)
Supplement: Table S3 — Number, rate, and rate ratio of adult and adolescent persons who inject drugs (PWID) living with diagnosed HIV infection, by selected characteristics—United States, 2010. (XLSX) [file pone.0097596.s003.xlsx]

## Sheet: Table S3
	Table S3. Number, rate, and rate ratio of adult and adolescent persons who inject drugs (PWID) living with diagnosed HIV infection , by selected characteristics--United States, 2010														Table S3, continued
	Males							Females							Total
	No. of PWID cases¶	Rate†	95% CI		Rate Ratio	95% CI		No. of PWID cases¶	Rate†	95% CI		Rate Ratio	95% CI		No. of PWID cases¶	Rate†	95% CI		Rate Ratio	95% CI
Race/ethnicity
White	16444	523.825	407 - 735		1	--		13382	968.689	850 - 1,127		1	--		29826	652.597	527 - 857		1	--
Black	45764	9444.54	6,811 - 15,399		18.0299	9.3 - 37.8		30042	12039.5	7,258 - 35,280		12.4287	6.4 - 41.5		75806	9824.56	6,677 - 18,583		15.0546	7.8 - 35.3
Hispanic/Latino*	22168	4983.5	3,584 - 8,176		9.51368	4.9 - 20.1		9069	6610.03	4,903 - 10,137		6.82369	4.4 - 11.9		31237	5007.6	3,672 - 7,871		7.67335	4.3 - 14.9
Other**	2140	1084.44	652 - 3,215		2.07024	0.9 - 7.9		1720	1415.2	1,083 - 2,040		1.46094	1.0 - 2.4		3860	1254.21	877 - 2,204		1.92188	1.0 - 4.2
Age at diagnosis
13-24	446	94.9308	66 - 172		1	--		730	301.241	269 - 342		1	--		1176	178.869	141 - 244		1	--
25-34	4022	566.481	384 - 1,082		5.9673	2.2 - 16.5		4934	1949.04	1,671 - 2,338		6.47002	4.9 - 8.7		8956	907.835	645 - 1,535		5.07542	2.6 - 10.9
35-49	32323	2496.67	1,952 - 3,463		26.2999	11.3 - 52.8		26223	4134.7	3,211 - 5,806		13.7255	9.4 - 21.6		58546	3018.79	2,382 - 4,121		16.8771	9.8 - 29.2
50-64	49724	3050.31	2,448 - 4,046		32.132	14.2 - 61.7		22327	3469.48	2,666 - 4,967		11.5173	7.8 - 18.4		72051	2915.71	2,204 - 4,306		16.3008	9.0 - 30.5
Overall	86515	1927.01	1,450 - 2,873		0.726242	0.4 - 1.4		54214	2653.4	2,098 - 3,610		1	--		140729	2146.93	1,643 - 3,098		--	--
	Note. Data include persons with a diagnosis of HIV infection regardless of stage of disease at diagnosis. CI=Confidence Interval.
	* Hispanics/Latinos may be of any race.
	** Other race includes American Indian/Alaska Native, Native Hawaiian/Other Pacific Islander, Unknown race/ethnicity, and multiple races
	¶ Number of cases diagnosed with HIV infection or living with HIV infection was statistically adjusted to account for reporting delays and missing risk factor information, but not for incomplete reporting.
	† Per 100,000 PWID
